# Supplementary material
Source: Springer Nature journal article supplement (https://www.springermedizin.de/resource/supplementary/12974_2010_303_MOESM2_ESM.pdf/9601208)

**MVN**

**IVN**

**SHAM**

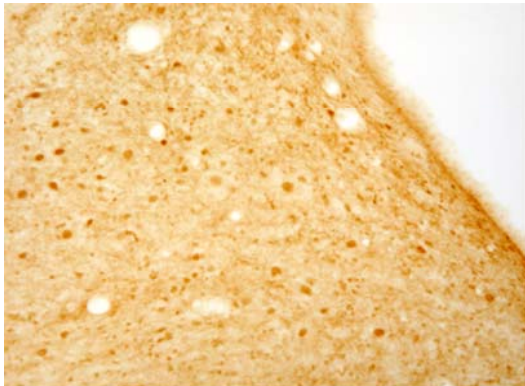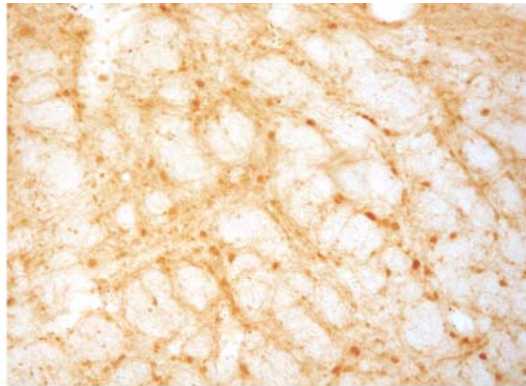

**LESIONED**

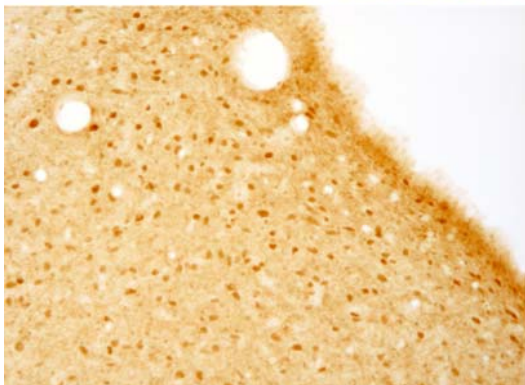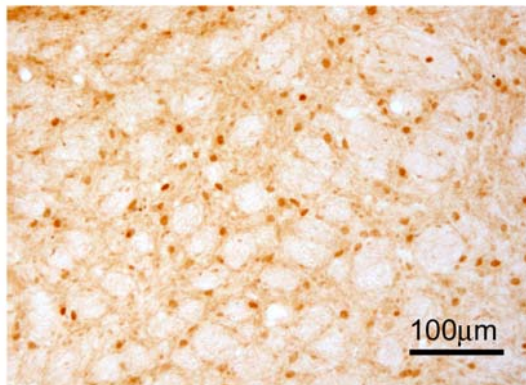

100μm

Supplement: MOESM2 [file 9601208]
